# Supplementary material for: Theoretical insight into the mechanism of photoreduction of CO2 to CO by graphitic carbon nitride
Source: Royal Society of Chemistry journal article supplement (doi:10.1039/c8cp06956e), 2018-12-21
Supplement: c8cp06956e1.pdf [file c8cp06956e1.pdf]

## Supporting Information

### Theoretical insight into the mechanism of photoreduction CO<sub>2</sub> to CO by graphitic carbon nitride

Hong-Zhang Wu,<sup>\*a</sup> Sateesh Bandaru,<sup>b</sup> Xiao-li Huang,<sup>a</sup> Jin Liu,<sup>a</sup> Li-Li Li,<sup>a</sup> and Zhenling Wang<sup>\*c</sup>

<sup>a</sup> Henan Key Laboratory of Rare Earth Functional Materials; International Joint Research Laboratory for Biomedical Nanomaterials of Henan; The Key Laboratory of Rare Earth Functional Materials and Applications, Zhoukou Normal University, Zhoukou 466001, China

<sup>b</sup> Beijing Computational Science Research Center, Beijing 100084, China

<sup>c</sup> College of Chemistry and Molecular Engineering, Zhengzhou University, Zhengzhou 450001, China

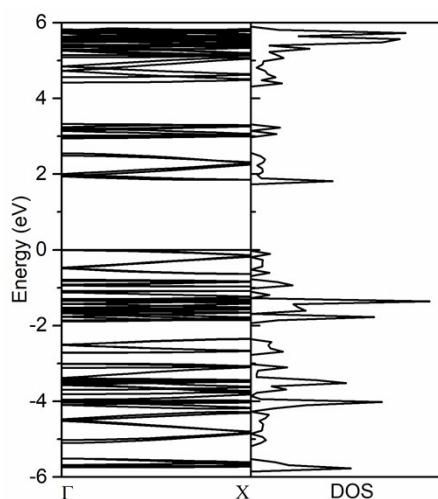

Fig. S1 Band dispersions and electronic density of state of g-C<sub>3</sub>N<sub>4</sub> with ideal edges. The underestimation of energy gap with standard functional PBE has been verified in our previous results.<sup>1</sup>

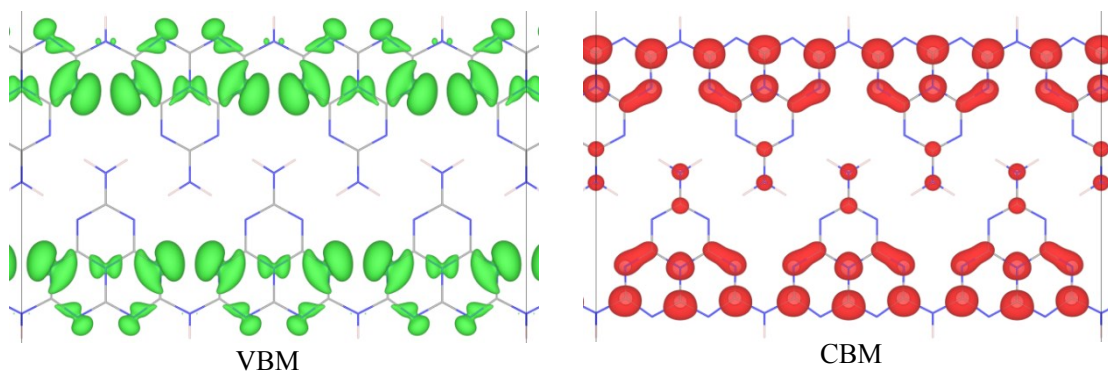

Fig. S2 Charge density of the valence band maximum (VBM) (green isosurface, isosurface = 0.001) and conductive band minimum (CBM) (red isosurface, isosurface = 0.001) of g-C<sub>3</sub>N<sub>4</sub> with ideal edges.

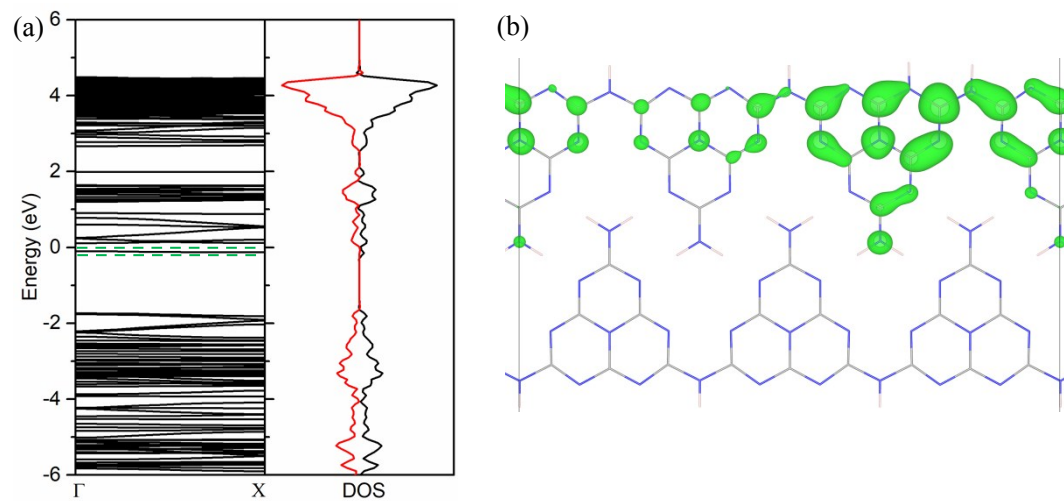

Fig. S3 (a) Band dispersions and electronic density of state of g-C<sub>3</sub>N<sub>4</sub> with a proton, (b) Charge density of g-C<sub>3</sub>N<sub>4</sub> with a proton at an energy range from -0.05 to 0 eV (corresponding to green dash line in (a)).

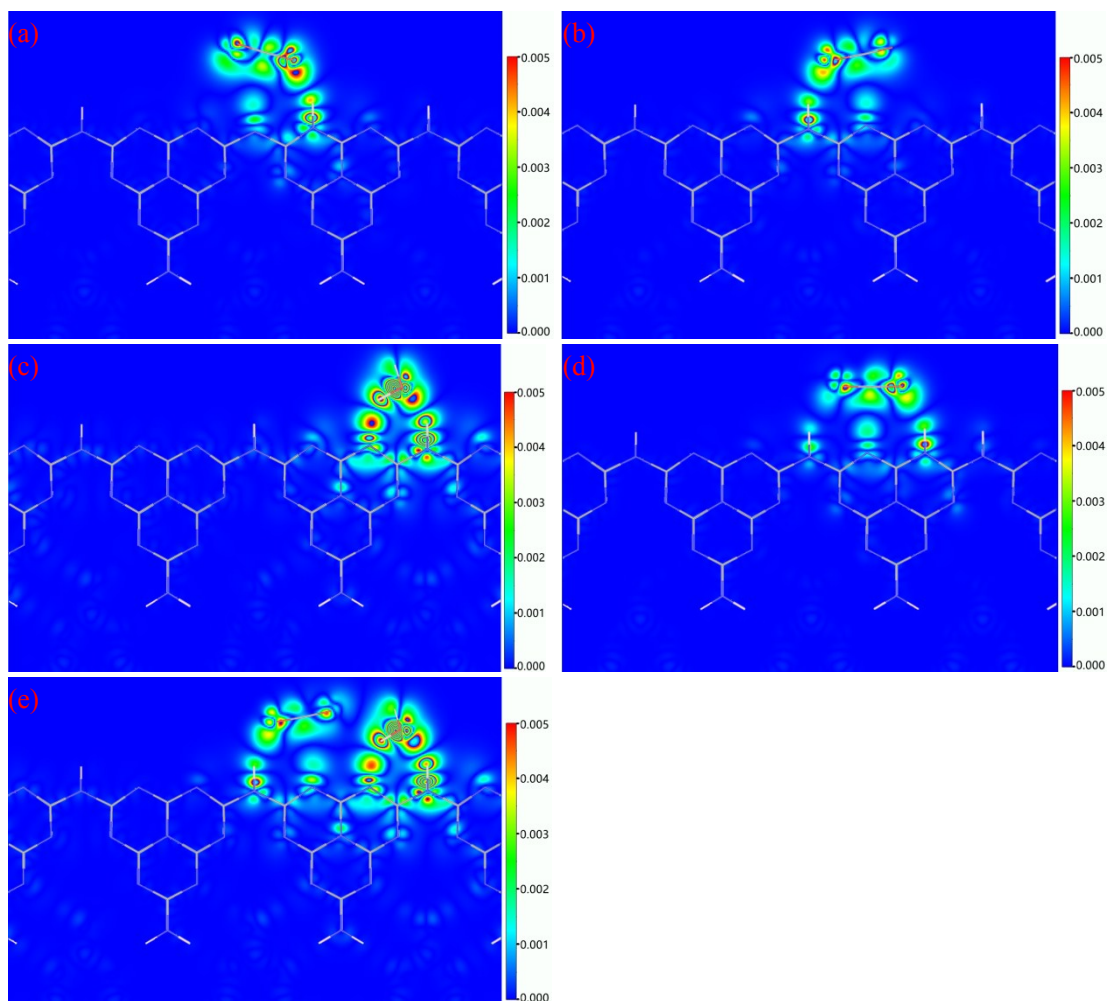

Fig. S4 Isosurface of the charge density difference resulting from adsorption of (a)  $\text{CO}_2$  at N1 site, (b)  $\text{CO}_2$  at N2 site, (c)  $\text{H}_2\text{O}$  at edge, (d)  $\text{CO}_2$  at N1 site with proton assistance, (e) and coadsorption of  $\text{CO}_2$  and  $\text{H}_2\text{O}$  at edge, respectively.

1 H.-Z. Wu, Q.-H. Zhong, S. Bandaru, J. Liu, W. M. Lau, L.-L. Li and Z. Wang, *J. Phys.: Condens. Matter.*, 2018, **30**, 155303.
